# Supplementary material
Source: PubMed Central journal article supplement (PMC1459364)
Supplement: pnas_0600980103_1.pdf [file pnas_0600980103_1.pdf]

A

 $\gamma$ -actin mAb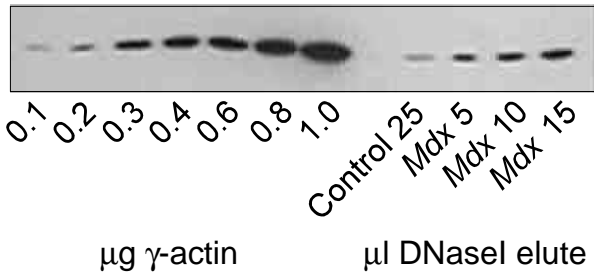

B

|                 | Control                   | <i>Mdx</i>                |
|-----------------|---------------------------|---------------------------|
| $\gamma$ -actin | $0.2 \pm 0.1 \mu\text{M}$ | $2.1 \pm 1.0 \mu\text{M}$ |
| $\alpha$ -actin | $893 \pm 42 \mu\text{M}$  | $811 \pm 15 \mu\text{M}$  |
